# Supplementary material for: Does routine uniportal thoracoscopy during rib fixation identify more injuries and impact outcomes?
Source: PubMed Central journal article supplement — J Thorac Dis. 2020 Oct;12(10):5281–8. doi: 10.21037/jtd-20-2087 (PMC7656410; doi:10.21037/jtd-20-2087), 2020-10
Supplement: jtd-12-10-5281-dss.pdf [file jtd-12-10-5281-dss.pdf]

## Data Sharing Statement

|                     |                                                                                                                                                    |                                                                                                                        |
|---------------------|----------------------------------------------------------------------------------------------------------------------------------------------------|------------------------------------------------------------------------------------------------------------------------|
| <b>Article Info</b> | <a href="http://dx.doi.org/10.21037/jtd-20-2087">http://dx.doi.org/10.21037/jtd-20-2087</a> .                                                      |                                                                                                                        |
| <b>Item</b>         | <b>Question</b>                                                                                                                                    | <b>Authors' Response<br/>(place "-" if not applicable)</b>                                                             |
| 1                   | Would you like to share data collected for your study to others?                                                                                   | Yes                                                                                                                    |
| 2                   | If not, would you like to share the reason for your decision?                                                                                      | -                                                                                                                      |
| 3                   | What data in particular will be shared?                                                                                                            | In particular, the incidental findings will be shared.                                                                 |
| 4                   | Any other documents will be share? Such as study protocol, statistical analysis plan, informed consent form, clinical study report, analytic code. | Statistical analysis plan will be shared if requested.                                                                 |
| 5                   | When will data availability begin?                                                                                                                 | From the publication date.                                                                                             |
| 6                   | When will data availability end?                                                                                                                   | Two years within publication date since new data may be updated over time.                                             |
| 7                   | To whom will you share the data?                                                                                                                   | Trauma surgeons and thoracic surgeons who are interested in uniportal thoracoscopy in the management of rib fractures. |
| 8                   | For what type of analysis or purpose?                                                                                                              | For analysis to evaluate if uniportal thoracoscopy impact outcomes in the management of rib fractures.                 |
| 9                   | How or where can the data/documents be obtained?                                                                                                   | Emails should be sent to the following email address to obtain the shared data:<br>jenny.bui117@gmail.com              |
| 10                  | Any other restrictions?                                                                                                                            | We may balance the potential benefits and risks of each request and then provide the data that could be shared.        |
